# Supplementary material for: Efficacy of introducing a checklist to reduce central venous line associated bloodstream infections in the ICU caring for adult patients
Source: Springer Nature journal article supplement (doi:10.1186/s12879-018-3178-6), 2018-06-08
Supplement: MOESM2 [file 15831822]

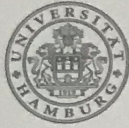

**Central venous catheter checklist**

**Setting:**

- |         |                       |            |                       |
|---------|-----------------------|------------|-----------------------|
| routine | <input type="radio"/> | emergency  | <input type="radio"/> |
| new     | <input type="radio"/> | reposition | <input type="radio"/> |
| cvl     | <input type="radio"/> | dialysis   | <input type="radio"/> |

- |         |                       |            |                       |         |                       |
|---------|-----------------------|------------|-----------------------|---------|-----------------------|
| jugular | <input type="radio"/> | subclavian | <input type="radio"/> | femoral | <input type="radio"/> |
| right   | <input type="radio"/> | left       | <input type="radio"/> |         |                       |

|                    |                     |
|--------------------|---------------------|
| Done independently | Done after reminded |
|--------------------|---------------------|

**Preparation:**

- |                                       |                       |                       |
|---------------------------------------|-----------------------|-----------------------|
| Putting on surgical hat               | <input type="radio"/> | <input type="radio"/> |
| Putting on face mask                  | <input type="radio"/> | <input type="radio"/> |
| Assisting person putting on face mask | <input type="radio"/> | <input type="radio"/> |
| Scrub disinfection of insertion site  | <input type="radio"/> | <input type="radio"/> |

**Clothing/Hand hygiene:**

- |                                                          |                       |                       |
|----------------------------------------------------------|-----------------------|-----------------------|
| Putting of watch/ring/bracelet/etc.                      | <input type="radio"/> | <input type="radio"/> |
| Washing hands with soap                                  | <input type="radio"/> | <input type="radio"/> |
| Hands dried                                              | <input type="radio"/> | <input type="radio"/> |
| Hand disinfection with alcohol based disinfectant (3min) | <input type="radio"/> | <input type="radio"/> |
| Putting on steril coat                                   | <input type="radio"/> | <input type="radio"/> |
| Coat closed on the back                                  | <input type="radio"/> | <input type="radio"/> |
| Putting on steril gloves                                 | <input type="radio"/> | <input type="radio"/> |
| Returning the coats checkcard                            | <input type="radio"/> | <input type="radio"/> |

**Preparation of the patient:**

- |                                                             |                       |                       |
|-------------------------------------------------------------|-----------------------|-----------------------|
| Patients skin dried                                         | <input type="radio"/> | <input type="radio"/> |
| Full steril draping in place (including borders of the bed) | <input type="radio"/> | <input type="radio"/> |

**Meta-data:**

Date: 05/03/12  
Starting time: 03:40  
Physician: [Redacted]

Finishing time: 03:50  
Assisting person: [Redacted]

Signature \_\_\_\_\_

Signature \_\_\_\_\_
